# Supplementary material for: Predictive Factors for Pancreatic Cancer and Its Early Detection Using Special Pancreatic Ultrasonography in High-Risk Individuals
Source: PubMed Central journal article supplement (PMC7865866; doi:10.3390/cancers13030502), 2021-01-28
Supplement: cancers-13-00502-s001.pdf [file cancers-13-00502-s001.pdf]

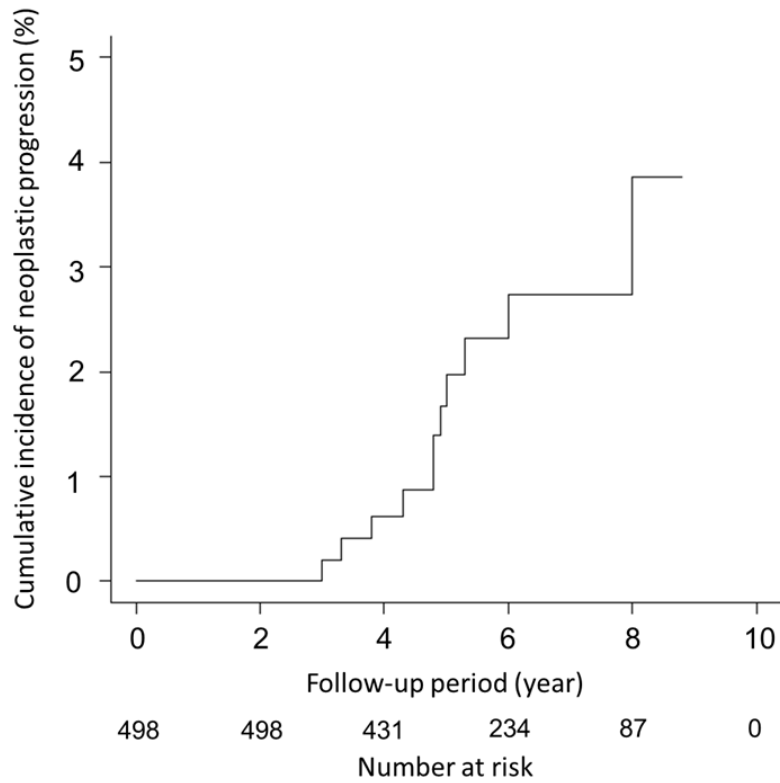

**Figure 1.** Cumulative incidence of neoplastic progression among 498 patients in the study population. The incidence at 5 years from initial surveillance was 2.0%, and the incidence at 8 years was 3.9%.

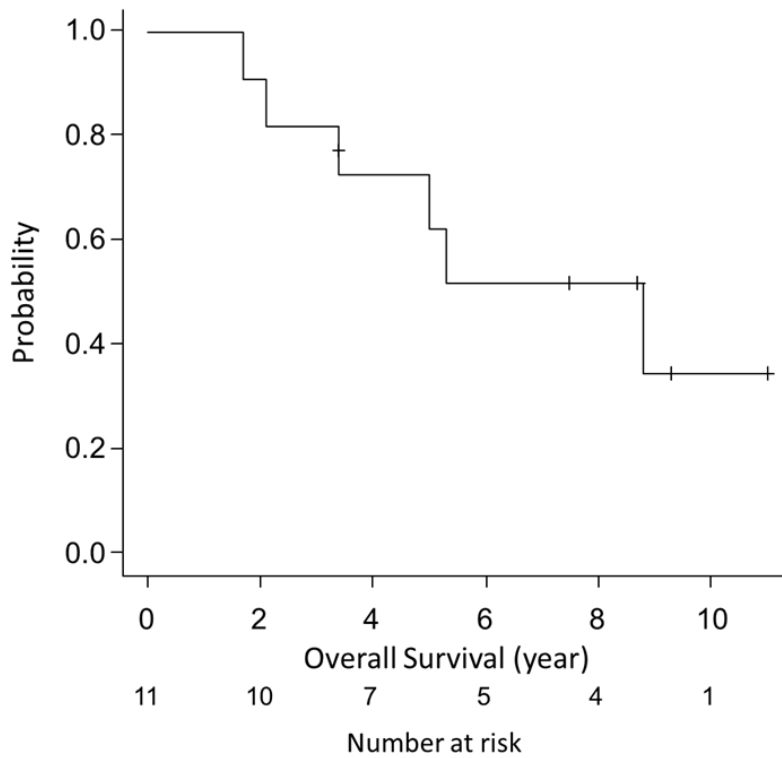

**Figure S2.** Overall survival time of eleven patients with neoplastic progression. The median overall survival time was 8.8 years
